# Supplementary material
Source: PubMed Central journal article supplement (PMC1134092)
Supplement: bj3840093add.pdf [file bj3840093add.pdf]

**Table S1 Proton chemical shifts of dp8 at 300 K**

<sup>1</sup>H chemical shifts (ppm) of free and complexed dp8. The values are given with a precision of  $\pm 0.02$  p.p.m. ND, not determined.

| Residue             | Proton | Free dp8 | Complexed dp8 |
|---------------------|--------|----------|---------------|
| GlcN(NS,6S)-1       | H1     | 5.49     | 5.45          |
|                     | H2     | 3.31     | 3.27          |
|                     | H3     | 3.75     | 3.73          |
|                     | H4     | 3.80     | 3.73          |
|                     | H5     | 4.17     | 4.15          |
|                     | H6     | 4.42     | 4.35          |
|                     | H6'    | 4.35     | 4.30          |
| IdoA(2S)-2          | H1     | 5.27     | 5.27          |
|                     | H2     | 4.39     | 4.34          |
|                     | H3     | 4.25     | 4.29          |
|                     | H4     | 4.15     | 4.14          |
|                     | H5     | 4.87     | ND            |
| GlcN(NS,6S)-3       | H1     | 5.45     | 5.34          |
|                     | H2     | 3.32     | 3.31          |
|                     | H3     | 3.71     | 3.67          |
|                     | H5     | 4.07     | 3.94          |
|                     | H6     | 4.44     | 4.38          |
|                     | H6'    | 4.32     | 4.30          |
| IdoA(2S)-4          | H1     | 5.27     | 5.25          |
|                     | H2     | 4.37     | 4.35          |
|                     | H3     | 4.24     | 4.29          |
|                     | H4     | 4.17     | 4.15          |
|                     | H5     | 4.81     | ND            |
| GlcN(NS,6S)-5       | H1     | 5.47     | 5.41          |
|                     | H2     | 3.33     | 3.30          |
|                     | H3     | 3.71     | 3.66          |
|                     | H4     | 3.82     | 3.75          |
|                     | H5     | 4.08     | 3.94          |
|                     | H6     | 4.44     | 4.38          |
|                     | H6'    | 4.32     | 4.27          |
| IdoA(2S)-6          | H1     | 5.26     | 5.24          |
|                     | H2     | 4.38     | 4.33          |
|                     | H3     | 4.26     | 4.32          |
|                     | H4     | 4.14     | 4.15          |
|                     | H5     | 4.86     | ND            |
| GlcN(NS,6S)-7       | H1     | 5.45     | 5.40          |
|                     | H2     | 3.35     | 3.33          |
|                     | H3     | 3.70     | 3.69          |
|                     | H4     | 3.88     | 3.86          |
|                     | H5     | 4.09     | 3.97          |
|                     | H6     | 4.39     | 4.35          |
|                     | H6'    | 4.30     | 4.24          |
| $\Delta$ HexA(2S)-8 | H1     | 5.55     | 5.55          |
|                     | H2     | 4.67     | 4.63          |
|                     | H3     | 4.36     | 4.35          |
|                     | H4     | 6.03     | 6.15          |

**Table S2 Proton chemical shifts of C-IFN $\gamma$  at 300 K**

<sup>1</sup>H chemical shifts (p.p.m.) of backbone atoms of free and complexed C-IFN $\gamma$ . The values are given with a precision of  $\pm 0.02$  p.p.m. ND, not determined.

| Residue | Proton | Free C-IFN $\gamma$ | Complexed C-IFN $\gamma$ |
|---------|--------|---------------------|--------------------------|
| Ala-123 | HN     | ND                  | ND                       |
|         | Ha     | ND                  | 4.197                    |
| Ala-124 | HN     | 8.61                | 8.53                     |
|         | Ha     | 4.36                | 4.45                     |
| Lys-125 | HN     | 8.53                | 8.42                     |
|         | Ha     | 4.38                | 4.47                     |
| Thr-126 | HN     | 8.14                | 8.13                     |
|         | Ha     | 4.35                | 4.43                     |
| Gly-127 | HN     | 8.42                | 8.33                     |
|         | Ha2    | 3.93                | 4.09                     |
|         | Ha3    | 4.03                | 4.09                     |
| Lys-128 | HN     | 8.25                | 8.10                     |
|         | Ha     | 4.29                | 4.34                     |
| Arg-129 | HN     | 8.39                | 8.27                     |
|         | Ha     | 4.31                | 4.38                     |
| Lys-130 | HN     | 8.43                | 8.22                     |
|         | Ha     | 4.28                | 4.34                     |
| Arg-131 | HN     | 8.49                | 8.25                     |
|         | Ha     | 4.33                | 4.38                     |
| Ser-132 | HN     | 8.41                | 8.22                     |
|         | Ha     | 4.40                | 4.44                     |
| Gln-133 | HN     | 8.43                | 8.24                     |
|         | Ha     | 4.34                | 4.39                     |
| Met-134 | HN     | 8.33                | 8.15                     |
|         | Ha     | 4.40                | 4.43                     |
| Leu-135 | HN     | 8.13                | 7.99                     |
|         | Ha     | 4.34                | 4.33                     |
| Phe-136 | HN     | 8.28                | 8.10                     |
|         | Ha     | 4.62                | 4.68                     |
| Arg-137 | HN     | 8.33                | 8.16                     |
|         | Ha     | 4.25                | 4.35                     |
| Gly-138 | HN     | 7.89                | 7.95                     |
|         | Ha2    | 3.89                | 4.02                     |
|         | Ha3    | 3.89                | 4.02                     |
| Arg-139 | HN     | 8.17                | 8.12                     |
|         | Ha     | 4.35                | 4.41                     |
| Arg-140 | HN     | 8.44                | 8.29                     |
|         | Ha     | 4.33                | 4.37                     |
| Ala-141 | HN     | 8.39                | 8.23                     |
|         | Ha     | 4.33                | 4.40                     |
| Ser-142 | HN     | 8.24                | 8.19                     |
|         | Ha     | 4.41                | 4.51                     |
| Gln-143 | HN     | 7.95                | 8.09                     |
|         | Ha     | 4.17                | 4.35                     |
